# Supplementary material for: Tanz zircon megacrysts: a new zircon reference material for the microbeam determination of U–Pb ages and Zr–O isotopes
Source: Royal Society of Chemistry journal article supplement (doi:10.1039/d1ja00311a), 2021-01-01
Supplement: d1ja00311a3.pdf [file d1ja00311a3.pdf]

**Electronic Supplementary Information (ESI)**

**Tanz Zircon Megacrysts: A New Zircon Reference  
Material for the Microbeam Determination of U-Pb  
Ages and Zr-O Isotopes**

**Zhaochu Hu,<sup>\*a</sup> Xian-Hua Li,<sup>b</sup> Tao Luo,<sup>a</sup> Wen Zhang,<sup>a</sup> James Crowley,<sup>c</sup> Qiuli Li,<sup>b</sup> Xiaoxiao Ling,<sup>b</sup> Chuan Yang,<sup>d</sup> Yang Li,<sup>b</sup> Lanping Feng,<sup>a</sup> Xiaoping Xia,<sup>e</sup> Shaobing Zhang,<sup>f</sup> Zaicong Wang,<sup>a</sup> Jinliang Guo,<sup>a</sup> Lei Xu,<sup>b</sup> Jie Lin,<sup>a</sup> Xiaoming Liu,<sup>g</sup> Zhian Bao,<sup>g</sup> Yongsheng Liu,<sup>a</sup> Keqing Zong,<sup>a</sup> Wei Chen<sup>a</sup> and Shenghong Hu<sup>a</sup>**

*<sup>a</sup>State Key Laboratory of Geological Processes and Mineral Resources, China  
University of Geosciences, Wuhan, 430074, PR China. (\*E-mail: zchu@vip.sina.com)*

*<sup>b</sup>State Key Laboratory of Lithospheric Evolution, Institute of Geology and Geophysics,  
Chinese Academy of Sciences, Beijing, 100029, PR China*

*<sup>c</sup>Department of Geosciences, Boise State University, 1910 University Drive, Boise, ID,  
83725, USA*

*<sup>d</sup>British Geological Survey, Keyworth, NG12 5GG, UK*

*<sup>e</sup>State Key Laboratory of Isotope Geochemistry, Guangzhou Institute of Geochemistry,  
Chinese Academy of Sciences, Guangzhou, 510640, PR China.*

*<sup>f</sup>CAS Key Laboratory of Crust-Mantle Materials and Environments, School of Earth  
and Space Sciences, University of Science and Technology of China, Hefei, 230026,  
China*

*<sup>g</sup>State Key Laboratory of Continental Dynamics, Department of Geology, Northwest  
University, Xi'an, 710069, PR China.*

**Tel.: +86 27 61055600, Fax: +86 27 67885096**

***Submitted to JAAS***

## **Table and figure captions**

**Table S1** U-Pb isotopic data of the Tanz zircon obtained with CA-ID-TIMS at BSU.

**Table S2** U-Pb isotopic data of the Tanz zircon obtained with CA-ID-TIMS at BGS.

**Table S3** The oxygen isotopic composition of the Tanz zircon obtained with laser fluorination at both IGGCAS and USTC.

**Table S4** The Zr isotopic composition of the Tanz zircon obtained with ID-TIMS at CUG.

**Fig. S1** Photographs of the Tanz zircon megacrysts.
