# Supplementary figures and images for: Tanz zircon megacrysts: a new zircon reference material for the microbeam determination of U–Pb ages and Zr–O isotopes
Source: Royal Society of Chemistry journal article supplement (doi:10.1039/d1ja00311a), 2021-01-01

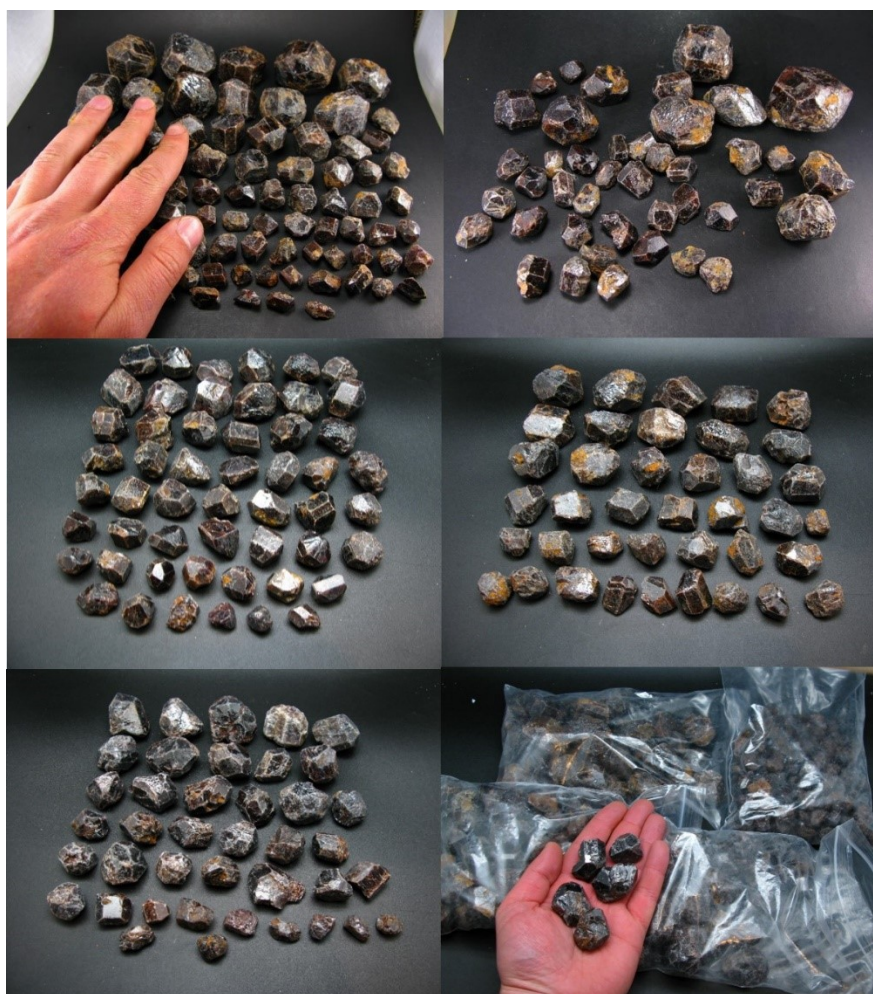

**Fig. S1** Photographs of the Tanz zircon megacrysts.

Supplement: d1ja00311a1.pdf [file d1ja00311a1.pdf]
